# Supplementary material
Source: publisher site journal article supplement (https://www.dovepress.com/get_supplementary_file.php?f=416325.docx)
Supplement: Supplementary file 1 [file get_supplementary_file.php]

**Supporting Information**

Supplemental Tables

Table S1 Gender differences following a single infusion dose of 10 mg/kg Injected Suramin Sodium in Healthy Subjects

| Parameters | Female  n=8 | Male  n=18 | *P* |
| --- | --- | --- | --- |
| Cmax, μg/mL | 159 (9.9) | 167 (16.5) | 0.2281 |
| AUC0-140d,h·mg/mL | 17.1(2.5) | 14.8 (2.8) | 0.0564 |
| AUC0-∞, h·mg/mL | 19.2 (2.6) | 17.0 (4.1) | 0.1233 |
| t1/2, h | 1131 (90.8) | 1171 (102.8) | 0.8120 |
| CL, mL/h | 28.8 (1.2) | 38.0 (1.9) | 0.0053* |
| V, L | 46.7 (4.1) | 61.8 (4.4) | 0.0472* |
| Body weight corrected CL, mL/h·kg | 0.52 (0.02) | 0.61 (0.03) | 0.0910 |
| Body weight corrected V, L/kg | 0.857(0.09) | 0.984 (0.05) | 0.2184 |

**Notes:** Data are expressed as mean (SD), *P<0.05: The difference of the PK parameters among different dose groups is considered to be statistically significant.

**Abbreviations:** AUC0-∞, area under the plasma concentration-time curve from time 0 to infinity; AUC0-140d, area under the plasma concentration-time curve from time 0 to 140 days; CL, apparent clearance; Cmax, maximum observed concentration; t1/2, terminal elimination phase half-life; V, apparent volume of distribution.

Table S2 Observed and simulated concentrations after 1 h single-intravenous infusion of suramin in children

| ID* | Age  (yr) | Weight  (kg) | 20 mg/kg  Dose (mg) | Plasma Concentration (μg/mL) | | | | | |
| --- | --- | --- | --- | --- | --- | --- | --- | --- | --- |
| 1-Hour | | 2-Day | | 45-Day | |
| Observed* | Predicted | Observed* | Predicted | Observed* | Predicted |
| 001 | 11 | 34.4 | 680 | 130 | 159 | 17.0 | 25.6 | 1.23 | 3.4 |
| 007 | 5 | 22.9 | 460 | 113 | 107 | 15.4 | 17.3 | 2.15 | 2.3 |
| 014 | 14 | 54.7 | 1000 | 143 | 234 | 13.7 | 37.6 | 1.34 | 5.04 |
| 005 | 7 | 25.1 | 500 | 131 | 117 | 13.7 | 18.8 | 2.27 | 2.52 |

*****Observed data from the reference [1]. Predicted concentrations were obtained from PK model based on our adult healthy subjects.

Reference:

[1] Naviaux R K, Curtis B, Li K, et al. Low-dose suramin in autism spectrum disorder: a small, phase I/II, randomized clinical trial. Ann Clin Transl Neurol. 2017; 4 (7): 491-505. doi:10.1002/acn3.424.

Supplementary Figures





Figure S1Suramin concentration-time curves in adults following intravenous administration of 15 mg/kg (a, b) and 10 mg/kg (c, d) on day 1, 5 or day 1, 3. Line represents the predicted values, solid symbols (a) represent the observed values in adult COVID-19 patients.
